# Supplementary material for: Transcriptomic analysis reveals that enterovirus F strain SWUN-AB001 infection activates JNK/SAPK and p38 MAPK signaling pathways in MDBK cells
Source: BMC Vet Res. 2018 Dec 13;14:395. doi: 10.1186/s12917-018-1721-8 (PMC6293526; doi:10.1186/s12917-018-1721-8)
Supplement: Supplementary file 7 — Table S5. KEGG pathway analysis of the differentially expressed genes in MDBK cells following EV-F7 infection at 12 and 24 h post-infection. (XLSX 61 kb) [file 12917_2018_1721_MOESM7_ESM.xlsx]

## Sheet: C1-vs-S1_Down
Pathway	DEGs annotation in term	DEGs with KEGG annotation	Genes annotation in term	All genes with KEGG annotation	Pvalue	FDR	Enrichment factor	Pathway ID	Level 1	Level 2	Genes	KOs
Ribosome	1	2	167	18435	0.01814	0.03628	55.1946	ko03010	Genetic Information Processing	Translation	RPL19	K02885
Neuroactive ligand-receptor interaction	1	2	365	18435	0.03931	0.03931	25.2534	ko04080	Environmental Information Processing	Signaling molecules and interaction	HRH3	K04151

## Sheet: C1-vs-S1_Up
Pathway	DEGs annotation in term	DEGs with KEGG annotation	Genes annotation in term	All genes with KEGG annotation	Pvalue	FDR	Enrichment factor	Pathway ID	Level 1	Level 2	Genes	KOs
Mucin type O-Glycan biosynthesis	1	10	41	18435	0.02254	0.163086	44.9634	ko00512	Metabolism	Glycan biosynthesis and metabolism	GALNT16	K00710
Glutathione metabolism	1	10	63	18435	0.03417	0.163086	29.2619	ko00480	Metabolism	Metabolism of other amino acids	RRM2	K10808
Acute myeloid leukemia	1	10	85	18435	0.04567	0.163086	21.6882	ko05221	Human Diseases	Cancers: Specific types	PIM1	K04702
Prion diseases	1	10	90	18435	0.04827	0.163086	20.4833	ko05020	Human Diseases	Neurodegenerative diseases	EGR1	K09203
NOD-like receptor signaling pathway	1	10	120	18435	0.06371	0.163086	15.3625	ko04621	Organismal Systems	Immune system	TNFAIP3	K11859
Pyrimidine metabolism	1	10	127	18435	0.06728	0.163086	14.5157	ko00240	Metabolism	Nucleotide metabolism	RRM2	K10808
p53 signaling pathway	1	10	135	18435	0.07135	0.163086	13.6556	ko04115	Cellular Processes	Cell growth and death	RRM2	K10808
TNF signaling pathway	1	10	165	18435	0.08646	0.164061	11.1727	ko04668	Environmental Information Processing	Signal transduction	TNFAIP3	K11859
NF-kappa B signaling pathway	1	10	211	18435	0.1092	0.164061	8.73697	ko04064	Environmental Information Processing	Signal transduction	TNFAIP3	K11859
Purine metabolism	1	10	218	18435	0.1126	0.164061	8.45642	ko00230	Metabolism	Nucleotide metabolism	RRM2	K10808
Jak-STAT signaling pathway	1	10	240	18435	0.1233	0.164061	7.68125	ko04630	Environmental Information Processing	Signal transduction	PIM1	K04702
Measles	1	10	255	18435	0.1305	0.164061	7.22941	ko05162	Human Diseases	Infectious diseases: Viral	TNFAIP3	K11859
MicroRNAs in cancer	1	10	261	18435	0.1333	0.164061	7.06322	ko05206	Human Diseases	Cancers: Overview	PIM1	K04702
Epstein-Barr virus infection	1	10	310	18435	0.1564	0.178743	5.94677	ko05169	Human Diseases	Infectious diseases: Viral	TNFAIP3	K11859
HTLV-I infection	1	10	427	18435	0.2093	0.223253	4.31733	ko05166	Human Diseases	Infectious diseases: Viral	EGR1	K09203
Metabolic pathways	2	10	1691	18435	0.2322	0.2322	2.18037	ko01100	Metabolism	Global and overview maps	RRM2;GALNT16	K10808+K00710

## Sheet: C2-vs-S2_Down
Pathway	DEGs annotation in term	DEGs with KEGG annotation	Genes annotation in term	All genes with KEGG annotation	Pvalue	FDR	Enrichment factor	Pathway ID	Level 1	Level 2	Genes	KOs
Mineral absorption	9	544	81	18435	0.0011	0.162445	3.76532	ko04978	Organismal Systems	Digestive system	ATP1B1;SLC40A1;VDR;ATP2B2;S100G;LOC525947;SLC34A2;SLC34A3;ATP1B4	K01540+K14685+K08539+K05850+K14734+K14736+K14683
Amyotrophic lateral sclerosis (ALS)	11	544	118	18435	0.001226	0.162445	3.15904	ko05014	Human Diseases	Neurodegenerative diseases	GRIN2A;LOC536445;MAP2K6;SLC1A2;GPX2;ALS2CL;ISOC2;PROB1;GPX3;MSS51;CABYR	K05209+K04433+K05613+K00432+K04575+K04432+K04574+K04348
MicroRNAs in cancer	17	544	261	18435	0.002867	0.17331	2.20726	ko05206	Human Diseases	Cancers: Overview	HOXA10;PIK3CD;DNMT3B;NOTCH4;TENM4;SNED1;TENM1;LOC789192;LOC101902808;CDKN2A;B3GNTL1;SOX12;LOC100296627;SCARF1;PKHD1;DDIT4L;ST14	K09295+K00922+K00558+K02599+K06252+K10145+K04514+K06621+K07204+K09268+K05658+K05099+K08270+K08670
Tuberculosis	21	544	355	18435	0.002937	0.17331	2.00463	ko05152	Human Diseases	Infectious diseases: Bacterial	TBC1D24;TLR4;C3;CD74;BOLA-DRB2;CCDC69;IL1A;GRB7;TMCO5B;BOLA-DMA;PLA2R1;MSS51;VDR;TLR6;LBP;MAPK10;LSP1;TLR2;ARHGEF3;BOLA-DRB3;ITGB2	K02155+K10160+K03990+K06505+K06752+K12478+K04383+K05855+K06560+K04348+K08539+K10169+K05399+K04440+K14957+K10159+K07532+K06464
p53 signaling pathway	11	544	135	18435	0.00327	0.17331	2.76123	ko04115	Cellular Processes	Cell growth and death	IGFBP5;IGFBP2;TSPAN1;RALGAPA2;LOC789192;CCNI2;CDKN2A;IGFBP3;SESN3;IGF1;LRRC30	K10138+K06509+K07207+K10145+K10146+K06621+K10141+K05459+K10130
Focal adhesion	23	544	428	18435	0.005788	0.255637	1.82108	ko04510	Cellular Processes	Cellular community	ITGA1;MYLK;VAV3;MYLK3;PIK3CD;NAV3;CHAD;HGF;IGF1R;LIMD2;TENM4;RASGRF1;COL3A1;AHNAK2;LAMA1;TENM1;LOC101902808;FERMT1;SCARF1;PKHD1;PPP1R16B;IGF1;MAPK10	K06480+K00907+K05730+K00922+K05699+K06248+K05460+K05087+K06236+K06252+K04349+K05637+K04514+K06271+K05099+K12329+K05459+K04440
Rheumatoid arthritis	12	544	173	18435	0.007215	0.265442	2.3506	ko05323	Human Diseases	Immune diseases	LTB;TBC1D24;TLR4;CTSK;ATP6V1B1;BOLA-DRB2;IL1A;BOLA-DMA;TNFSF13B;TLR2;BOLA-DRB3;ITGB2	K03157+K02155+K10160+K01371+K02147+K06752+K04383+K05476+K10159+K06464
Leishmaniasis	9	544	112	18435	0.008101	0.265442	2.72313	ko05140	Human Diseases	Infectious diseases: Parasitic	TLR4;C3;BOLA-DRB2;IL1A;BOLA-DMA;PTPN6;TLR2;BOLA-DRB3;ITGB2	K10160+K03990+K06752+K04383+K05697+K10159+K06464
Pancreatic secretion	10	544	136	18435	0.009469	0.265442	2.49175	ko04972	Organismal Systems	Digestive system	CHRM3;ATP1B1;TPCN1;PROCA1;ATP2A1;CD38;ATP2A3;ATP2B2;PLA2G4F;ATP1B4	K04131+K01540+K14077+K01047+K05853+K01242+K05850
Hematopoietic cell lineage	11	544	161	18435	0.0109	0.265442	2.31532	ko04640	Organismal Systems	Immune system	ITGA1;LOC515418;TMEM69;BOLA-DRB2;IL1A;NEPN;CD38;BOLA-DMA;LOC100336476;LOC100336606;BOLA-DRB3	K06480+K06448+K04012+K06752+K04383+K06260+K01242+K05066
Nicotinate and nicotinamide metabolism	5	544	43	18435	0.01179	0.265442	3.94045	ko00760	Metabolism	Metabolism of cofactors and vitamins	QPRT;NADSYN1;CD38;NMNAT3;NMNAT2	K00767+K01950+K01242+K06210
Complement and coagulation cascades	12	544	192	18435	0.0149	0.265442	2.11799	ko04610	Organismal Systems	Immune system	TMEM69;C3;MASP2;F5;CFB;F8;PIK3IP1;LOC515150;C1R;LOC506707;LOC515917;C8G	K04012+K03990+K03993+K03902+K01335+K03899+K01343+K04002+K01330+K03909+K03999
Toll-like receptor signaling pathway	10	544	148	18435	0.01583	0.265442	2.28972	ko04620	Organismal Systems	Immune system	TLR4;CTSK;MAP2K6;PIK3CD;TLR5;ISOC2;TLR6;LBP;MAPK10;TLR2	K10160+K01371+K04433+K00922+K10168+K04432+K10169+K05399+K04440+K10159
Endocrine and other factor-regulated calcium reabsorption	6	544	65	18435	0.01605	0.265442	3.12811	ko04961	Organismal Systems	Excretory system	ATP1B1;CALB1;DNM3;VDR;ATP2B2;ATP1B4	K01540+K14757+K01528+K08539+K05850
Toxoplasmosis	11	544	172	18435	0.01667	0.265442	2.16725	ko05145	Human Diseases	Infectious diseases: Parasitic	TLR4;MAP2K6;PIK3CD;BOLA-DRB2;ISOC2;LAMA1;BOLA-DMA;VLDLR;MAPK10;TLR2;BOLA-DRB3	K10160+K04433+K00922+K06752+K04432+K05637+K12473+K04440+K10159
Melanoma	7	544	86	18435	0.01744	0.265442	2.75831	ko05218	Human Diseases	Cancers: Specific types	PIK3CD;HGF;IGF1R;CDKN2A;FGF2;PKHD1;IGF1	K00922+K05460+K05087+K06621+K04358+K05099+K05459
Axon guidance	15	544	270	18435	0.01792	0.265442	1.88266	ko04360	Organismal Systems	Development	NRP1;ABLIM2;ARHGAP24;RGS10;SEMA3B;ARHGEF19;LOC101902808;RGS16;FLRT2;MSS51;DMTN;PKHD1;SH2D3A;ARHGEF3;SEMA6A	K06724+K07520+K07526+K07524+K06840+K07525+K04514+K07523+K04348+K05099+K07527+K07532+K06842
Pertussis	9	544	129	18435	0.01803	0.265442	2.36427	ko05133	Human Diseases	Infectious diseases: Bacterial	TLR4;C3;IL1A;NOD1;LOC515150;C1R;LOC506707;MAPK10;ITGB2	K10160+K03990+K04383+K08727+K04002+K01330+K04440+K06464
Metabolic pathways	64	544	1691	18435	0.02668	0.359769	1.28257	ko01100	Metabolism	Global and overview maps	GAA;B3GNT6;AK4;TBC1D24;DPYD;LOC510369;ABO;QPRT;MLYCD;ADSSL1;MTHFR;NADSYN1;DHRS3;FUT6;FAM213B;ATP6V1B1;DNMT3B;NINL;UROC1;GGT1;UPP2;PROCA1;ECHDC3;DGKI;ALPL;ITPKB;EBPL;MPI;OXSM;ACO2;LOC101905992;ALAD;CD38;TNS1;HSD3B1;NMNAT3;AFMID;TNS3;EXTL1;PCYT1B;GALNS;ACER1;PNPO;AMT;AKR1A1;GALK2;HSD11B1L;UROS;MPST;SHROOM4;LOC520336;GANC;METRNL;GNPDA1;PIGV;TTR;AZIN2;POLR3H;PLA2G4F;FAH;HSD3B7;NMNAT2;TST;ACSF3	K12316+K00739+K00939+K02155+K00207+K00760+K00709+K00767+K01578+K01939+K00297+K01950+K11146+K07633+K15717+K02147+K00558+K00688+K01712+K00681+K00757+K01047+K07511+K00901+K01077+K00911+K01824+K01809+K09458+K01681+K01080+K01698+K01242+K00665+K00070+K06210+K01432+K02368+K00968+K01132+K01441+K00275+K00605+K00002+K00849+K15680+K01719+K01011+K00742+K12317+K02564+K07542+K07127+K01583+K03022+K01555+K12408+…
Nicotine addiction	5	544	55	18435	0.02851	0.359769	3.08072	ko05033	Human Diseases	Substance dependence	GRIN2A;LOC536445;SLC32A1;GABRP;GABRE	K05209+K15015+K05189+K05185
Aldosterone-regulated sodium reabsorption	5	544	55	18435	0.02851	0.359769	3.08072	ko04960	Organismal Systems	Excretory system	ATP1B1;PIK3CD;SCNN1A;IGF1;ATP1B4	K01540+K00922+K04824+K05459
cGMP-PKG signaling pathway	14	544	268	18435	0.0334	0.38784	1.77026	ko04022	Environmental Information Processing	Signal transduction	ATP1B1;MYLK;MYLK3;PIK3CD;ADRA2A;ATP2A1;MRVI1;AHNAK2;ATP2A3;NFATC4;LOC101902808;MSS51;ATP2B2;ATP1B4	K01540+K00907+K00922+K04138+K05853+K12337+K04446+K04514+K04348+K05850
Proteoglycans in cancer	19	544	407	18435	0.03893	0.38784	1.58199	ko05205	Human Diseases	Cancers: Overview	VAV3;TLR4;HOXA10;PLEKHG6;PIK3CD;HGF;HCLS1;IGF1R;WNT2B;LIMD2;COL3A1;LOC101902808;SDC2;PTPN6;PKHD1;PPP1R16B;IGF1;TLR2;ARHGEF3	K05730+K10160+K09295+K12330+K00922+K05460+K06106+K05087+K00182+K06236+K04514+K06257+K05697+K05099+K12329+K05459+K10159+K07532
Glycerophospholipid metabolism	8	544	126	18435	0.03925	0.38784	2.15161	ko00564	Metabolism	Lipid metabolism	PROCA1;DGKI;LOC101905992;PCYT1B;GPD1;SHROOM4;METRNL;PLA2G4F	K01047+K00901+K01080+K00968+K00006
Fatty acid biosynthesis	3	544	24	18435	0.04115	0.38784	4.23598	ko00061	Metabolism	Lipid metabolism	OXSM;TNS1;TNS3	K09458+K00665
beta-Alanine metabolism	4	544	42	18435	0.04226	0.38784	3.22742	ko00410	Metabolism	Metabolism of other amino acids	DPYD;MLYCD;ECHDC3;CARNS1	K00207+K01578+K07511+K14755
Choline metabolism in cancer	9	544	152	18435	0.04264	0.38784	2.00652	ko05231	Human Diseases	Cancers: Overview	PIK3CD;DGKI;LOC101905992;SLC44A4;RALGAPA2;PCYT1B;SHROOM4;METRNL;MAPK10	K00922+K00901+K01080+K15377+K07207+K00968+K04440
Ras signaling pathway	18	544	385	18435	0.0431	0.38784	1.58437	ko04014	Environmental Information Processing	Signal transduction	GRIN2A;LOC536445;PIK3CD;RASAL1;HGF;IGF1R;PROCA1;FGFR2;PLA1A;RASGRF1;ANGPTL7;FGF2;RAPGEF5;PKHD1;IGF1;MAPK10;FOXO4;PLA2G4F	K05209+K00922+K12380+K05460+K05087+K01047+K05093+K13618+K04349+K05467+K04358+K08019+K05099+K05459+K04440+K12358
AMPK signaling pathway	11	544	202	18435	0.04369	0.38784	1.84538	ko04152	Environmental Information Processing	Signal transduction	PIK3CD;MLYCD;IGF1R;PPARGC1A;TNS1;RALGAPA2;TNS3;B3GNTL1;PAQR6;COL8A2;IGF1	K00922+K01578+K05087+K07202+K00665+K07207+K07204+K07297+K07296+K05459
Glutathione metabolism	5	544	63	18435	0.04532	0.38784	2.68951	ko00480	Metabolism	Metabolism of other amino acids	MGST2;GGT1;GPX2;GPX3;GGCT	K00799+K00681+K00432+K00682
Gastric acid secretion	8	544	130	18435	0.04537	0.38784	2.08541	ko04971	Organismal Systems	Digestive system	CHRM3;ATP1B1;MYLK;MYLK3;SLC26A7;AHNAK2;KCNJ16;ATP1B4	K04131+K01540+K00907+K13962+K05009
Phagosome	15	544	310	18435	0.04851	0.396858	1.63974	ko04145	Cellular Processes	Transport and catabolism	TBC1D24;TLR4;C3;ATP6V1B1;BOLA-DRB2;CCDC69;TMCO5B;BOLA-DMA;PLA2R1;C1R;TUBA1D;TLR6;TLR2;BOLA-DRB3;ITGB2	K02155+K10160+K03990+K02147+K06752+K12478+K06560+K01330+K07374+K10169+K10159+K06464
Rap1 signaling pathway	18	544	392	18435	0.04942	0.396858	1.55608	ko04015	Environmental Information Processing	Signal transduction	PLEKHA6;GRIN2A;LOC536445;VAV3;MAP2K6;PIK3CD;HGF;IGF1R;FGFR2;ISOC2;ANGPTL7;FERMT1;CNR1;FGF2;RAPGEF5;PKHD1;IGF1;ITGB2	K06082+K05209+K05730+K04433+K00922+K05460+K05087+K05093+K04432+K05467+K06271+K04277+K04358+K08019+K05099+K05459+K06464
Renal cell carcinoma	6	544	87	18435	0.05093	0.396954	2.33709	ko05211	Human Diseases	Cancers: Specific types	ARNT2;PIK3CD;HGF;EGLN1;PKHD1;EGLN3	K15589+K00922+K05460+K09592+K05099
HIF-1 signaling pathway	9	544	161	18435	0.05654	0.428089	1.89435	ko04066	Environmental Information Processing	Signal transduction	TLR4;PDK1;PIK3CD;IGF1R;EGLN1;ANGPTL7;LOC525947;IGF1;EGLN3	K10160+K12077+K00922+K05087+K09592+K05467+K14736+K05459
mTOR signaling pathway	6	544	91	18435	0.06015	0.442771	2.23436	ko04150	Environmental Information Processing	Signal transduction	RICTOR;PIK3CD;RALGAPA2;B3GNTL1;IGF1;DDIT4L	K08267+K00922+K07207+K07204+K05459+K08270
Epithelial cell signaling in Helicobacter pylori infection	6	544	92	18435	0.06261	0.443805	2.21008	ko05120	Human Diseases	Infectious diseases: Bacterial	TBC1D24;ATP6V1B1;NOD1;JAM3;PKHD1;MAPK10	K02155+K02147+K08727+K06785+K05099+K04440
Calcium signaling pathway	15	544	323	18435	0.06364	0.443805	1.57374	ko04020	Environmental Information Processing	Signal transduction	CHRM3;GRIN2A;LOC536445;MYLK;MYLK3;CACNA1G;ITPKB;ATP2A1;AHNAK2;CD38;ATP2A3;OXTR;MSS51;ATP2B2;CAPS	K04131+K05209+K00907+K04854+K00911+K05853+K01242+K04229+K04348+K05850+K12042
Inflammatory bowel disease (IBD)	8	544	143	18435	0.06943	0.471768	1.89582	ko05321	Human Diseases	Immune diseases	TLR4;TLR5;BOLA-DRB2;IL1A;NFATC4;BOLA-DMA;TLR2;BOLA-DRB3	K10160+K10168+K06752+K04383+K04446+K10159
PI3K-Akt signaling pathway	23	544	556	18435	0.07269	0.481571	1.40184	ko04151	Environmental Information Processing	Signal transduction	ITGA1;TLR4;PIK3CD;CHAD;HGF;IGF1R;LIMD2;FGFR2;TENM4;GRB7;COL3A1;IL2RB;LAMA1;RALGAPA2;TENM1;ANGPTL7;B3GNTL1;FGF2;SCARF1;PKHD1;IGF1;TLR2;DDIT4L	K06480+K10160+K00922+K06248+K05460+K05087+K06236+K05093+K06252+K05855+K05069+K05637+K07207+K05467+K07204+K04358+K05099+K05459+K10159+K08270
Legionellosis	6	544	98	18435	0.07853	0.507572	2.07477	ko05134	Human Diseases	Infectious diseases: Bacterial	TLR4;C3;TLR5;BNIP3;TLR2;ITGB2	K10160+K03990+K10168+K15464+K10159+K06464
Cell adhesion molecules (CAMs)	14	544	310	18435	0.08436	0.513692	1.53042	ko04514	Environmental Information Processing	Signaling molecules and interaction	CLDN8;LOC614522;BOLA-DRB2;BOLA-DMA;SDC2;CNTNAP2;LOC784457;FLRT2;CLDN2;JAM3;CYB5D1;BOLA-DRB3;VSTM1;ITGB2	K06087+K06531+K06752+K06257+K07380+K07523+K06785+K06464
Thyroid hormone signaling pathway	9	544	176	18435	0.08561	0.513692	1.7329	ko04919	Organismal Systems	Endocrine system	ATP1B1;PIK3CD;NOTCH4;ATP2A1;ATP2A3;SNED1;RALGAPA2;AKAP14;ATP1B4	K01540+K00922+K02599+K05853+K07207+K15143
Platelet activation	12	544	258	18435	0.08941	0.513692	1.57618	ko04611	Organismal Systems	Immune system	MYLK;PLEKHG6;MYLK3;PIK3CD;LIMD2;GRB7;NEPN;COL3A1;AHNAK2;LOC101902808;FERMT1;ARHGEF3	K00907+K12330+K00922+K06236+K05855+K06260+K04514+K06271+K07532
B cell receptor signaling pathway	8	544	152	18435	0.08993	0.513692	1.78357	ko04662	Organismal Systems	Immune system	IFITM2;VAV3;TMEM69;PIK3CD;GRB7;NFATC4;MSS51;PTPN6	K06566+K05730+K04012+K00922+K05855+K04446+K04348+K05697
Adherens junction	9	544	181	18435	0.09697	0.513692	1.68503	ko04520	Cellular Processes	Cellular community	PLEKHA6;NAV3;IGF1R;LOC614522;LOC784457;CYB5D1;PTPN6;PKHD1;VSTM1	K06082+K05699+K05087+K06531+K05697+K05099
Type II diabetes mellitus	5	544	80	18435	0.09709	0.513692	2.11799	ko04930	Human Diseases	Endocrine and metabolic diseases	PIK3CD;CACNA1G;COL8A2;MAPK10;PRKCE	K00922+K04854+K07296+K04440+K06068
Vitamin digestion and absorption	4	544	57	18435	0.09741	0.513692	2.3781	ko04977	Organismal Systems	Digestive system	CUBN;LOC100337457;KREMEN1;LOC514257	K14616+K14611
Fc epsilon RI signaling pathway	6	544	105	18435	0.09972	0.513692	1.93645	ko04664	Organismal Systems	Immune system	VAV3;MAP2K6;PIK3CD;GRB7;ISOC2;MAPK10	K05730+K04433+K00922+K05855+K04432+K04440
Glyoxylate and dicarboxylate metabolism	3	544	36	18435	0.1004	0.513692	2.82399	ko00630	Metabolism	Carbohydrate metabolism	ACO2;AFMID;AMT	K01681+K01432+K00605
Notch signaling pathway	5	544	81	18435	0.1008	0.513692	2.09184	ko04330	Environmental Information Processing	Signal transduction	NOTCH4;SNED1;MAML3;DTX1;BCAS1	K02599+K06061+K06058+K06065
Fat digestion and absorption	5	544	81	18435	0.1008	0.513692	2.09184	ko04975	Organismal Systems	Digestive system	PROCA1;LOC101905992;ABCA1;SLC27A1;PLA2G4F	K01047+K01080+K05641+K08745
Hypertrophic cardiomyopathy (HCM)	8	544	158	18435	0.1053	0.522639	1.71584	ko05410	Human Diseases	Cardiovascular diseases	ITGA1;DTNB;ATP2A1;ATP2A3;LAMA1;MYOM3;LOC101904481;IGF1	K06480+K10366+K05853+K05637+K12567+K09290+K05459
Carbohydrate digestion and absorption	4	544	59	18435	0.1065	0.522639	2.29748	ko04973	Organismal Systems	Digestive system	ATP1B1;PIK3CD;GNAT2;ATP1B4	K01540+K00922+K04631
Herpes simplex infection	14	544	325	18435	0.1106	0.525268	1.45979	ko05168	Human Diseases	Infectious diseases: Viral	TAF6L;C3;PER3;LOC614522;CD74;BOLA-DRB2;BOLA-DMA;TPGS1;LOC784457;CYB5D1;MAPK10;TLR2;BOLA-DRB3;VSTM1	K03131+K03990+K02633+K06531+K06505+K06752+K02207+K04440+K10159
Sulfur metabolism	2	544	18	18435	0.111	0.525268	3.76532	ko00920	Metabolism	Energy metabolism	MPST;TST	K01011
Ovarian steroidogenesis	4	544	61	18435	0.1159	0.531828	2.22216	ko04913	Organismal Systems	Endocrine system	IGF1R;HSD3B1;VLDLR;IGF1	K05087+K00070+K12473+K05459
Salivary secretion	8	544	162	18435	0.1164	0.531828	1.67347	ko04970	Organismal Systems	Digestive system	CHRM3;ATP1B1;DMBT1;MUC5AC;CD38;MUC5B;ATP2B2;ATP1B4	K04131+K01540+K13912+K13908+K01242+K05850
Sulfur relay system	2	544	19	18435	0.1205	0.536057	3.56714	ko04122	Genetic Information Processing	Folding, sorting and degradation	MPST;TST	K01011
Phototransduction	4	544	64	18435	0.1308	0.536057	2.11799	ko04744	Organismal Systems	Sensory system	GNAT2;GUCY2D;KCNIP2;RGS6	K04631+K12321+K13764+K13765
cAMP signaling pathway	15	544	365	18435	0.1328	0.536057	1.39265	ko04024	Environmental Information Processing	Signal transduction	GRIN2A;ATP1B1;LOC536445;VAV3;PIK3CD;ATP2A1;LOC100299180;ATP2A3;NFATC4;LOC531747;LOC101902808;OXTR;ATP2B2;MAPK10;ATP1B4	K05209+K01540+K05730+K00922+K05853+K05673+K04446+K11265+K04514+K04229+K05850+K04440
Neuroactive ligand-receptor interaction	15	544	365	18435	0.1328	0.536057	1.39265	ko04080	Environmental Information Processing	Signaling molecules and interaction	CHRM3;GRIN2A;LOC536445;ADRA2A;HRH3;P2RY8;GABRP;P2RY14;MC1R;OXTR;CNR1;GPR35;GABRE;NYNRIN;RXFP4	K04131+K05209+K04138+K04151+K08386+K05189+K04299+K04199+K04229+K04277+K04276+K05185+K04228+K08398
Biotin metabolism	1	544	4	18435	0.1353	0.536057	8.47197	ko00780	Metabolism	Metabolism of cofactors and vitamins	OXSM	K09458
Degradation of aromatic compounds	1	544	4	18435	0.1353	0.536057	8.47197	ko01220	Metabolism	Global and overview maps	AKR1A1	K00002
ECM-receptor interaction	10	544	224	18435	0.1367	0.536057	1.51285	ko04512	Environmental Information Processing	Signaling molecules and interaction	ITGA1;CHAD;LIMD2;TENM4;NEPN;COL3A1;LAMA1;TENM1;SDC2;SCARF1	K06480+K06248+K06236+K06252+K06260+K05637+K06257
Prion diseases	5	544	90	18435	0.1372	0.536057	1.88266	ko05020	Human Diseases	Neurodegenerative diseases	TRANK1;NOTCH4;IL1A;SNED1;C8G	K09553+K02599+K04383+K03999
One carbon pool by folate	2	544	21	18435	0.14	0.536057	3.22742	ko00670	Metabolism	Metabolism of cofactors and vitamins	MTHFR;AMT	K00297+K00605
Dilated cardiomyopathy	8	544	170	18435	0.1402	0.536057	1.59472	ko05414	Human Diseases	Cardiovascular diseases	ITGA1;DTNB;ATP2A1;ATP2A3;LAMA1;MYOM3;LOC101904481;IGF1	K06480+K10366+K05853+K05637+K12567+K09290+K05459
Oxytocin signaling pathway	11	544	254	18435	0.1415	0.536057	1.46758	ko04921	Organismal Systems	Endocrine system	MYLK;MYLK3;PIK3CD;TRPM2;AHNAK2;CD38;NFATC4;LOC101902808;OXTR;MSS51;PPP1R16B	K00907+K00922+K04977+K01242+K04446+K04514+K04229+K04348+K12329
Glycerolipid metabolism	5	544	91	18435	0.1416	0.536057	1.86197	ko00561	Metabolism	Lipid metabolism	DGKI;LOC101905992;AKR1A1;SHROOM4;METRNL	K00901+K01080+K00002
Ether lipid metabolism	4	544	67	18435	0.1463	0.546049	2.02316	ko00565	Metabolism	Lipid metabolism	PROCA1;LOC101905992;ENPP6;PLA2G4F	K01047+K01080+K08743
Galactose metabolism	3	544	44	18435	0.1514	0.557236	2.31054	ko00052	Metabolism	Carbohydrate metabolism	GAA;GALK2;GANC	K12316+K00849+K12317
Proximal tubule bicarbonate reclamation	2	544	23	18435	0.16	0.580822	2.94677	ko04964	Organismal Systems	Excretory system	ATP1B1;ATP1B4	K01540
Influenza A	13	544	322	18435	0.1674	0.591301	1.36814	ko05164	Human Diseases	Infectious diseases: Viral	TLR4;AGFG2;MAP2K6;PIK3CD;BOLA-DRB2;IL1A;NLRX1;ISOC2;BOLA-DMA;ZC3H6;MAPK10;BOLA-DRB3;TMPRSS2	K10160+K15044+K04433+K00922+K06752+K04383+K12653+K04432+K14404+K04440+K09633
Nitrogen metabolism	2	544	24	18435	0.1703	0.591301	2.82399	ko00910	Metabolism	Energy metabolism	CRP;CA12	K01672
Arachidonic acid metabolism	5	544	98	18435	0.1738	0.591301	1.72897	ko00590	Metabolism	Lipid metabolism	FAM213B;PROCA1;GPX2;GPX3;PLA2G4F	K15717+K01047+K00432
Transcriptional misregulation in cancer	16	544	415	18435	0.1768	0.591301	1.30652	ko05202	Human Diseases	Cancers: Overview	ARNT2;SIX5;HOXA10;IGFBP5;PER3;IGF1R;CDKN2C;HOXA9;IGFBP2;IL2RB;PIK3IP1;SMAD9;IGFBP3;PKHD1;IGF1;TMPRSS2	K15589+K15615+K09295+K10138+K02633+K05087+K06622+K09294+K05069+K01343+K04676+K05099+K05459+K09633
Intestinal immune network for IgA production	6	544	126	18435	0.1788	0.591301	1.61371	ko04672	Organismal Systems	Immune system	CCR9;BOLA-DRB2;BOLA-DMA;CCL28;TNFSF13B;BOLA-DRB3	K04184+K06752+K05513+K05476
Amino sugar and nucleotide sugar metabolism	4	544	73	18435	0.1794	0.591301	1.85687	ko00520	Metabolism	Carbohydrate metabolism	HOGA1;MPI;GALK2;GNPDA1	K01639+K01809+K00849+K02564
Drug metabolism - other enzymes	3	544	48	18435	0.1795	0.591301	2.11799	ko00983	Metabolism	Xenobiotics biodegradation and metabolism	DPYD;LOC510369;UPP2	K00207+K00760+K00757
Cardiac muscle contraction	5	544	100	18435	0.1834	0.591301	1.69439	ko04260	Organismal Systems	Circulatory system	ATP1B1;ATP2A1;ATP2A3;LOC101904481;ATP1B4	K01540+K05853+K09290
Fatty acid metabolism	4	544	74	18435	0.1851	0.591301	1.83178	ko01212	Metabolism	Global and overview maps	ECHDC3;OXSM;TNS1;TNS3	K07511+K09458+K00665
Phospholipase D signaling pathway	9	544	212	18435	0.1852	0.591301	1.43864	ko04072	Environmental Information Processing	Signal transduction	PIK3CD;DGKI;GRB7;LOC101905992;RALGAPA2;DNM3;SHROOM4;METRNL;NYNRIN	K00922+K00901+K05855+K01080+K07207+K01528+K04228
Lysosome	8	544	186	18435	0.1945	0.611041	1.45754	ko04142	Cellular Processes	Transport and catabolism	GAA;TBC1D24;CTSK;TPP1;CTSO;GALNS;ARSG;IGF2R	K12316+K02155+K01371+K01279+K01374+K01132+K12381+K06564
Signaling pathways regulating pluripotency of stem cells	8	544	187	18435	0.1981	0.611041	1.44975	ko04550	Cellular Processes	Cellular community	PIK3CD;IGF1R;WNT2B;FGFR2;LOC100847387;SMAD9;HAND2;IGF1	K00922+K05087+K00182+K05093+K09301+K04676+K09071+K05459
Hippo signaling pathway - fly	5	544	103	18435	0.1983	0.611041	1.64504	ko04391	Environmental Information Processing	Signal transduction	RASSF2;DFNB31;SMAD9;TSHZ1;MAPK10	K09851+K12076+K04676+K09236+K04440
Pathways in cancer	22	544	611	18435	0.2044	0.616548	1.22019	ko05200	Human Diseases	Cancers: Overview	ARNT2;PLEKHG6;PIK3CD;HGF;IGF1R;MGST2;WNT2B;FGFR2;LAMA1;EGLN1;LOC101902808;LOC100336476;CDKN2A;LOC101904481;LOC100336606;FGF2;PKHD1;IGF1;MAPK10;ARHGEF3;SUFU;EGLN3	K15589+K12330+K00922+K05460+K05087+K00799+K00182+K05093+K05637+K09592+K04514+K05066+K06621+K09290+K04358+K05099+K05459+K04440+K07532+K06229
Cyanoamino acid metabolism	1	544	7	18435	0.2076	0.616548	4.84112	ko00460	Metabolism	Metabolism of other amino acids	GGT1	K00681
Glycosaminoglycan biosynthesis - heparan sulfate / heparin	2	544	28	18435	0.2121	0.616548	2.42056	ko00534	Metabolism	Glycan biosynthesis and metabolism	HS6ST1;EXTL1	K02514+K02368
Malaria	6	544	134	18435	0.214	0.616548	1.51737	ko05144	Human Diseases	Infectious diseases: Parasitic	TLR4;HGF;SDC2;PKHD1;TLR2;ITGB2	K10160+K05460+K06257+K05099+K10159+K06464
Epstein-Barr virus infection	12	544	310	18435	0.2156	0.616548	1.31179	ko05169	Human Diseases	Infectious diseases: Viral	MAP2K6;TMEM69;PIK3CD;BOLA-DRB2;GRB7;ISOC2;CD38;BOLA-DMA;BCAS1;MAPK10;BOLA-DRB3;POLR3H	K04433+K04012+K00922+K06752+K05855+K04432+K01242+K06065+K04440+K03022
Glycosphingolipid biosynthesis - lacto and neolacto series	3	544	53	18435	0.2163	0.616548	1.91818	ko00601	Metabolism	Glycan biosynthesis and metabolism	ABO;FUT6;LOC520336	K00709+K07633+K00742
FoxO signaling pathway	7	544	163	18435	0.2164	0.616548	1.45531	ko04068	Environmental Information Processing	Signal transduction	PIK3CD;IGF1R;BNIP3;CCNI2;IGF1;MAPK10;FOXO4	K00922+K05087+K15464+K10146+K05459+K04440+K12358
Synaptic vesicle cycle	5	544	107	18435	0.2187	0.616548	1.58355	ko04721	Organismal Systems	Nervous system	TBC1D24;SLC32A1;ATP6V1B1;DNM3;SYT7	K02155+K15015+K02147+K01528+K15290
Vitamin B6 metabolism	1	544	8	18435	0.2303	0.630862	4.23598	ko00750	Metabolism	Metabolism of cofactors and vitamins	PNPO	K00275
Staphylococcus aureus infection	8	544	196	18435	0.2321	0.630862	1.38318	ko05150	Human Diseases	Infectious diseases: Bacterial	C3;MASP2;BOLA-DRB2;BOLA-DMA;CFB;C1R;BOLA-DRB3;ITGB2	K03990+K03993+K06752+K01335+K01330+K06464
Arrhythmogenic right ventricular cardiomyopathy (ARVC)	6	544	138	18435	0.2325	0.630862	1.47339	ko05412	Human Diseases	Cardiovascular diseases	ITGA1;DTNB;NAV3;ATP2A1;ATP2A3;LAMA1	K06480+K10366+K05699+K05853+K05637
Histidine metabolism	2	544	30	18435	0.2333	0.630862	2.25919	ko00340	Metabolism	Amino acid metabolism	UROC1;CARNS1	K01712+K14755
Cytokine-cytokine receptor interaction	13	544	349	18435	0.2413	0.634806	1.2623	ko04060	Environmental Information Processing	Signaling molecules and interaction	CCR9;LTB;HGF;TNFRSF19;IL1A;CTF1;IL2RB;LOC100336476;LOC100336606;CCL28;TNFSF13B;PKHD1;TNFSF18	K04184+K03157+K05460+K05155+K04383+K05422+K05069+K05066+K05513+K05476+K05099+K05479
Collecting duct acid secretion	2	544	31	18435	0.244	0.634806	2.18631	ko04966	Organismal Systems	Excretory system	TBC1D24;ATP6V1B1	K02155+K02147
MAPK signaling pathway - fly	2	544	31	18435	0.244	0.634806	2.18631	ko04013	Environmental Information Processing	Signal transduction	RASAL1;SNX30	K12380+K08545
Fatty acid degradation	3	544	57	18435	0.2468	0.634806	1.78357	ko00071	Metabolism	Lipid metabolism	ECI1;ECHDC3;ECI2	K13238+K07511+K13239
Inflammatory mediator regulation of TRP channels	6	544	142	18435	0.2514	0.634806	1.43188	ko04750	Organismal Systems	Sensory system	MAP2K6;PIK3CD;ISOC2;IGF1;MAPK10;PRKCE	K04433+K00922+K04432+K05459+K04440+K06068
Central carbon metabolism in cancer	4	544	85	18435	0.2517	0.634806	1.59472	ko05230	Human Diseases	Cancers: Overview	PDK1;PIK3CD;FGFR2;PKHD1	K12077+K00922+K05093+K05099
Lipoic acid metabolism	1	544	9	18435	0.2524	0.634806	3.76532	ko00785	Metabolism	Metabolism of cofactors and vitamins	ACSF3	K01896
Amoebiasis	10	544	263	18435	0.2588	0.634806	1.28851	ko05146	Human Diseases	Infectious diseases: Parasitic	TLR4;LOC515418;PIK3CD;NAV3;LIMD2;COL3A1;LAMA1;TLR2;C8G;ITGB2	K10160+K06448+K00922+K05699+K06236+K05637+K10159+K03999+K06464
RNA degradation	5	544	115	18435	0.2613	0.634806	1.47339	ko03018	Genetic Information Processing	Folding, sorting and degradation	PATL1;PNLDC1;ANGEL1;DIS3L2;TOB2	K12617+K01148+K12603+K12585+K14443
Pathogenic Escherichia coli infection	7	544	174	18435	0.2634	0.634806	1.36331	ko05130	Human Diseases	Infectious diseases: Bacterial	TLR4;CLDN8;HCLS1;TLR5;LOC101902808;CLDN2;TUBA1D	K10160+K06087+K06106+K10168+K04514+K07374
Other glycan degradation	2	544	33	18435	0.2654	0.634806	2.05381	ko00511	Metabolism	Glycan biosynthesis and metabolism	C1QTNF6;HEXDC	K01227+K14459
Glutamatergic synapse	6	544	145	18435	0.2659	0.634806	1.40226	ko04724	Organismal Systems	Nervous system	SHANK2;GRIN2A;LOC536445;SLC1A2;SLC1A3;MSS51	K15009+K05209+K05613+K05614+K04348
ABC transporters	6	544	145	18435	0.2659	0.634806	1.40226	ko02010	Environmental Information Processing	Membrane transport	ABCC5;SETD4;LOC100299180;ABCA10;ABCA1;LOC100296627	K05668+K05662+K05673+K05652+K05641+K05658
Regulation of actin cytoskeleton	17	544	484	18435	0.2718	0.643098	1.19028	ko04810	Cellular Processes	Cell motility	CHRM3;ITGA1;MYLK;VAV3;PLEKHG6;MYLK3;PIK3CD;NAV3;FGFR2;PPFIA4;AHNAK2;LOC101902808;SPATA13;FGF2;PPP1R16B;ARHGEF3;ITGB2	K04131+K06480+K00907+K05730+K12330+K00922+K05699+K05093+K10352+K04514+K05769+K04358+K12329+K07532+K06464
T cell receptor signaling pathway	8	544	207	18435	0.2762	0.645763	1.30968	ko04660	Organismal Systems	Immune system	VAV3;CREG2;PIK3CD;DFNB31;NFATC4;MSS51;PTPN6;MAPK10	K05730+K06453+K00922+K12076+K04446+K04348+K05697+K04440
Vascular smooth muscle contraction	12	544	330	18435	0.2778	0.645763	1.23229	ko04270	Organismal Systems	Circulatory system	MYLK;PLEKHG6;MYLK3;PROCA1;MRVI1;PPFIA4;AHNAK2;LOC101902808;PPP1R16B;PRKCE;ARHGEF3;PLA2G4F	K00907+K12330+K01047+K12337+K10352+K04514+K12329+K06068+K07532
Cysteine and methionine metabolism	3	544	62	18435	0.2857	0.657931	1.63974	ko00270	Metabolism	Amino acid metabolism	DNMT3B;MPST;TST	K00558+K01011
HTLV-I infection	15	544	427	18435	0.288	0.657931	1.19044	ko05166	Human Diseases	Infectious diseases: Viral	NRP1;PIK3CD;CDKN2C;WNT2B;BOLA-DRB2;DFNB31;IL2RB;NFATC4;BOLA-DMA;CDKN2A;MSS51;FERMT1;MAPK10;BOLA-DRB3;ITGB2	K06724+K00922+K06622+K00182+K06752+K12076+K05069+K04446+K06621+K04348+K06271+K04440+K06464
Butanoate metabolism	2	544	36	18435	0.2975	0.673825	1.88266	ko00650	Metabolism	Carbohydrate metabolism	ECHDC3;ACSF3	K07511+K01896
Fc gamma R-mediated phagocytosis	6	544	153	18435	0.3054	0.685856	1.32894	ko04666	Organismal Systems	Immune system	VAV3;PIK3CD;GRB7;LOC101905992;DNM3;PRKCE	K05730+K00922+K05855+K01080+K01528+K06068
Osteoclast differentiation	8	544	216	18435	0.3139	0.695404	1.25511	ko04380	Organismal Systems	Development	CTSK;MAP2K6;PIK3CD;IL1A;GRB7;NFATC4;MSS51;MAPK10	K01371+K04433+K00922+K04383+K05855+K04446+K04348+K04440
Circadian rhythm - fly	1	544	12	18435	0.3149	0.695404	2.82399	ko04711	Organismal Systems	Environmental adaptation	PER3	K02633
alpha-Linolenic acid metabolism	2	544	38	18435	0.3188	0.698198	1.78357	ko00592	Metabolism	Lipid metabolism	PROCA1;PLA2G4F	K01047
Prostate cancer	5	544	129	18435	0.3395	0.715298	1.31348	ko05215	Human Diseases	Cancers: Specific types	PIK3CD;IGF1R;MGST2;FGFR2;IGF1	K00922+K05087+K00799+K05093+K05459
Progesterone-mediated oocyte maturation	5	544	129	18435	0.3395	0.715298	1.31348	ko04914	Organismal Systems	Endocrine system	PIK3CD;IGF1R;STOM;IGF1;MAPK10	K00922+K05087+K03364+K05459+K04440
Propanoate metabolism	2	544	40	18435	0.3399	0.715298	1.69439	ko00640	Metabolism	Carbohydrate metabolism	MLYCD;ECHDC3	K01578+K07511
Leukocyte transendothelial migration	8	544	223	18435	0.3438	0.715298	1.21571	ko04670	Organismal Systems	Immune system	VAV3;CLDN8;PIK3CD;NAV3;LOC101902808;CLDN2;JAM3;ITGB2	K05730+K06087+K00922+K05699+K04514+K06785+K06464
Shigellosis	5	544	130	18435	0.3452	0.715298	1.30338	ko05131	Human Diseases	Infectious diseases: Bacterial	HCLS1;UBE2D4;NOD1;LOC101902808;MAPK10	K06106+K06689+K08727+K04514+K04440
Chagas disease (American trypanosomiasis)	7	544	192	18435	0.3453	0.715298	1.2355	ko05142	Human Diseases	Infectious diseases: Parasitic	TLR4;CREG2;PIK3CD;C3;TLR6;MAPK10;TLR2	K10160+K06453+K00922+K03990+K10169+K04440+K10159
Chemokine signaling pathway	9	544	255	18435	0.3459	0.715298	1.19604	ko04062	Organismal Systems	Immune system	CCR9;VAV3;PIK3CD;ARRB1;LOC101902808;DEPTOR;CCL28;PRKCE;ARHGEF37	K04184+K05730+K00922+K04439+K04514+K12365+K05513+K06068
Endocytosis	13	544	383	18435	0.3483	0.715298	1.15024	ko04144	Cellular Processes	Transport and catabolism	SRL;IGF1R;CCDC69;FGFR2;ARRB1;IL2RB;TMCO5B;DNM3;RAB11FIP4;VLDLR;PKHD1;IGF2R;DAB2	K12483+K05087+K12478+K05093+K04439+K05069+K01528+K12485+K12473+K05099+K06564+K12475
Insulin resistance	6	544	162	18435	0.351	0.715298	1.25511	ko04931	Human Diseases	Endocrine and metabolic diseases	PIK3CD;NINL;PPARGC1A;SLC27A1;MAPK10;PRKCE	K00922+K00688+K07202+K08745+K04440+K06068
Taurine and hypotaurine metabolism	1	544	14	18435	0.3536	0.715298	2.42056	ko00430	Metabolism	Metabolism of other amino acids	GGT1	K00681
Starch and sucrose metabolism	3	544	72	18435	0.3644	0.731561	1.41199	ko00500	Metabolism	Carbohydrate metabolism	GAA;NINL;GANC	K12316+K00688+K12317
Glioma	4	544	103	18435	0.368	0.733233	1.31603	ko05214	Human Diseases	Cancers: Specific types	PIK3CD;IGF1R;CDKN2A;IGF1	K00922+K05087+K06621+K05459
Porphyrin and chlorophyll metabolism	2	544	43	18435	0.3712	0.733559	1.57618	ko00860	Metabolism	Metabolism of cofactors and vitamins	ALAD;UROS	K01698+K01719
Retrograde endocannabinoid signaling	5	544	135	18435	0.3737	0.733559	1.25511	ko04723	Organismal Systems	Nervous system	SLC32A1;GABRP;CNR1;MAPK10;GABRE	K15015+K05189+K04277+K04440+K05185
Insulin signaling pathway	8	544	233	18435	0.3872	0.744304	1.16353	ko04910	Organismal Systems	Endocrine system	PIK3CD;NINL;PPARGC1A;TNS1;RALGAPA2;TNS3;B3GNTL1;MAPK10	K00922+K00688+K07202+K00665+K07207+K07204+K04440
Thyroid hormone synthesis	4	544	106	18435	0.3876	0.744304	1.27879	ko04918	Organismal Systems	Endocrine system	ATP1B1;GPX2;GPX3;ATP1B4	K01540+K00432
Morphine addiction	4	544	106	18435	0.3876	0.744304	1.27879	ko05032	Human Diseases	Substance dependence	SLC32A1;GABRP;ARRB1;GABRE	K15015+K05189+K04439+K05185
Circadian entrainment	5	544	138	18435	0.3908	0.74505	1.22782	ko04713	Organismal Systems	Environmental adaptation	GRIN2A;LOC536445;PER3;CACNA1G;LOC531747	K05209+K02633+K04854+K11265
MAPK signaling pathway	12	544	365	18435	0.397	0.751464	1.11412	ko04010	Environmental Information Processing	Signal transduction	MAP2K6;CACNA1G;FGFR2;IL1A;PPM1K;ARRB1;RASGRF1;ISOC2;NFATC4;MSS51;FGF2;MAPK10	K04433+K04854+K05093+K04383+K04461+K04439+K04349+K04432+K04446+K04348+K04358+K04440
Adipocytokine signaling pathway	4	544	108	18435	0.4006	0.752824	1.25511	ko04920	Organismal Systems	Endocrine system	PPARGC1A;PAQR6;COL8A2;MAPK10	K07202+K07297+K07296+K04440
Cocaine addiction	3	544	77	18435	0.4034	0.752824	1.32031	ko05030	Human Diseases	Substance dependence	GRIN2A;LOC536445;RGS6	K05209+K13765
Protein digestion and absorption	7	544	207	18435	0.4156	0.770168	1.14597	ko04974	Organismal Systems	Digestive system	ATP1B1;ZC3H12D;LIMD2;COL3A1;SLC7A7;SLC36A4;ATP1B4	K01540+K08131+K06236+K13867+K14209
Linoleic acid metabolism	2	544	48	18435	0.4219	0.776413	1.41199	ko00591	Metabolism	Lipid metabolism	PROCA1;PLA2G4F	K01047
Bile secretion	6	544	179	18435	0.438	0.797904	1.13591	ko04976	Organismal Systems	Digestive system	ATP1B1;LOC100299180;AQP9;LOC100296627;VLDLR;ATP1B4	K01540+K05673+K09877+K05658+K12473
Systemic lupus erythematosus	10	544	311	18435	0.4396	0.797904	1.08964	ko05322	Human Diseases	Immune diseases	GRIN2A;LOC536445;NAV3;C3;BOLA-DRB2;BOLA-DMA;LOC614376;C1R;C8G;BOLA-DRB3	K05209+K05699+K03990+K06752+K11252+K01330+K03999
Adrenergic signaling in cardiomyocytes	7	544	217	18435	0.4623	0.815687	1.09316	ko04261	Organismal Systems	Circulatory system	ATP1B1;PIK3CD;ATP2A1;ATP2A3;LOC101904481;ATP2B2;ATP1B4	K01540+K00922+K05853+K09290+K05850
Type I diabetes mellitus	4	544	118	18435	0.4646	0.815687	1.14874	ko04940	Human Diseases	Endocrine and metabolic diseases	BOLA-DRB2;IL1A;BOLA-DMA;BOLA-DRB3	K06752+K04383
Purine metabolism	7	544	218	18435	0.4669	0.815687	1.08814	ko00230	Metabolism	Nucleotide metabolism	AK4;LOC510369;GUCY2D;ADSSL1;LOC531747;TTR;POLR3H	K00939+K00760+K12321+K01939+K11265+K07127+K03022
Viral myocarditis	6	544	185	18435	0.4683	0.815687	1.09907	ko05416	Human Diseases	Cardiovascular diseases	DTNB;BOLA-DRB2;LAMA1;BOLA-DMA;BOLA-DRB3;ITGB2	K10366+K06752+K05637+K06464
Phosphatidylinositol signaling system	5	544	152	18435	0.4697	0.815687	1.11473	ko04070	Environmental Information Processing	Signal transduction	PIK3CD;DGKI;ITPKB;SHROOM4;METRNL	K00922+K00901+K00911
Pantothenate and CoA biosynthesis	1	544	21	18435	0.4728	0.815687	1.61371	ko00770	Metabolism	Metabolism of cofactors and vitamins	DPYD	K00207
Folate biosynthesis	1	544	21	18435	0.4728	0.815687	1.61371	ko00790	Metabolism	Metabolism of cofactors and vitamins	ALPL	K01077
NOD-like receptor signaling pathway	4	544	120	18435	0.4771	0.815687	1.1296	ko04621	Organismal Systems	Immune system	CARD6;NOD1;LRRC28;MAPK10	K12797+K08727+K12796+K04440
Apoptosis	4	544	120	18435	0.4771	0.815687	1.1296	ko04210	Cellular Processes	Cell growth and death	PIK3CD;ENDOG;IL1A;MSS51	K00922+K01173+K04383+K04348
Terpenoid backbone biosynthesis	1	544	23	18435	0.5026	0.853776	1.47339	ko00900	Metabolism	Metabolism of terpenoids and polyketides	FNTB	K05954
Dorso-ventral axis formation	2	544	58	18435	0.5164	0.856116	1.16855	ko04320	Organismal Systems	Development	NOTCH4;SNED1	K02599
Natural killer cell mediated cytotoxicity	8	544	263	18435	0.5166	0.856116	1.03081	ko04650	Organismal Systems	Immune system	VAV3;CREG2;PIK3CD;GRB7;NFATC4;MSS51;PTPN6;ITGB2	K05730+K06453+K00922+K05855+K04446+K04348+K05697+K06464
2-Oxocarboxylic acid metabolism	1	544	24	18435	0.5169	0.856116	1.41199	ko01210	Metabolism	Global and overview maps	ACO2	K01681
Glycosaminoglycan biosynthesis - chondroitin sulfate / dermatan sulfate	1	544	24	18435	0.5169	0.856116	1.41199	ko00532	Metabolism	Glycan biosynthesis and metabolism	CHST3	K01020
Tryptophan metabolism	2	544	59	18435	0.5253	0.864624	1.14874	ko00380	Metabolism	Amino acid metabolism	ECHDC3;AFMID	K07511+K01432
Lysine degradation	3	544	96	18435	0.5429	0.882629	1.059	ko00310	Metabolism	Amino acid metabolism	SETMAR;ECHDC3;TMLHE	K11433+K07511+K00474
Steroid hormone biosynthesis	3	544	96	18435	0.5429	0.882629	1.059	ko00140	Metabolism	Lipid metabolism	HSD3B1;HSD11B1L;SRD5A1	K00070+K15680+K12343
Taste transduction	2	544	63	18435	0.5597	0.901321	1.07581	ko04742	Organismal Systems	Sensory system	GNAT2;SCNN1A	K04631+K04824
GnRH signaling pathway	4	544	134	18435	0.5612	0.901321	1.01158	ko04912	Organismal Systems	Endocrine system	MAP2K6;ISOC2;MAPK10;PRKCE	K04433+K04432+K04440+K06068
Graft-versus-host disease	4	544	135	18435	0.5669	0.904491	1.00408	ko05332	Human Diseases	Immune diseases	BOLA-DRB2;IL1A;BOLA-DMA;BOLA-DRB3	K06752+K04383
Maturity onset diabetes of the young	1	544	28	18435	0.57	0.904491	1.21028	ko04950	Human Diseases	Endocrine and metabolic diseases	HNF1B	K08034
Fatty acid elongation	1	544	29	18435	0.5824	0.910133	1.16855	ko00062	Metabolism	Lipid metabolism	ECHDC3	K07511
Bacterial invasion of epithelial cells	4	544	138	18435	0.5839	0.910133	0.982257	ko05100	Human Diseases	Infectious diseases: Bacterial	PIK3CD;HCLS1;DNM3;PKHD1	K00922+K06106+K01528+K05099
Hedgehog signaling pathway	2	544	66	18435	0.5843	0.910133	1.02691	ko04340	Environmental Information Processing	Signal transduction	WNT2B;SUFU	K00182+K06229
Carbon metabolism	4	544	139	18435	0.5894	0.910133	0.97519	ko01200	Metabolism	Global and overview maps	MTHFR;ECHDC3;ACO2;AMT	K00297+K07511+K01681+K00605
NF-kappa B signaling pathway	6	544	211	18435	0.5928	0.910133	0.963636	ko04064	Environmental Information Processing	Signal transduction	LTB;TLR4;GRB7;TNFSF13B;LBP;LRRC30	K03157+K10160+K05855+K05476+K05399+K10130
Asthma	3	544	105	18435	0.602	0.910133	0.968225	ko05310	Human Diseases	Immune diseases	BOLA-DRB2;BOLA-DMA;BOLA-DRB3	K06752
Glycosaminoglycan degradation	1	544	31	18435	0.606	0.910133	1.09316	ko00531	Metabolism	Glycan biosynthesis and metabolism	GALNS	K01132
Steroid biosynthesis	1	544	31	18435	0.606	0.910133	1.09316	ko00100	Metabolism	Lipid metabolism	EBPL	K01824
Arginine and proline metabolism	2	544	69	18435	0.6079	0.910133	0.982257	ko00330	Metabolism	Amino acid metabolism	CARNS1;AZIN2	K14755+K01583
Sphingolipid metabolism	2	544	69	18435	0.6079	0.910133	0.982257	ko00600	Metabolism	Lipid metabolism	LOC101905992;ACER1	K01080+K01441
Basal cell carcinoma	2	544	70	18435	0.6156	0.91388	0.968225	ko05217	Human Diseases	Cancers: Specific types	WNT2B;SUFU	K00182+K06229
Glycosylphosphatidylinositol(GPI)-anchor biosynthesis	1	544	32	18435	0.6173	0.91388	1.059	ko00563	Metabolism	Glycan biosynthesis and metabolism	PIGV	K07542
Salmonella infection	7	544	254	18435	0.6236	0.917398	0.933918	ko05132	Human Diseases	Infectious diseases: Bacterial	TLR4;TLR5;IL1A;PPFIA4;LOC101902808;LBP;MAPK10	K10160+K10168+K04383+K10352+K04514+K05399+K04440
Long-term potentiation	3	544	109	18435	0.6266	0.917398	0.932694	ko04720	Organismal Systems	Nervous system	GRIN2A;LOC536445;MSS51	K05209+K04348
Pancreatic cancer	3	544	110	18435	0.6326	0.917722	0.924215	ko05212	Human Diseases	Cancers: Specific types	PIK3CD;CDKN2A;MAPK10	K00922+K06621+K04440
Hepatitis C	5	544	185	18435	0.6385	0.917722	0.915888	ko05160	Human Diseases	Infectious diseases: Viral	CLDN8;PIK3CD;CLDN2;VLDLR;MAPK10	K06087+K00922+K12473+K04440
Insulin secretion	3	544	111	18435	0.6385	0.917722	0.915888	ko04911	Organismal Systems	Endocrine system	CHRM3;ATP1B1;ATP1B4	K04131+K01540
Drug metabolism - cytochrome P450	2	544	74	18435	0.6449	0.917722	0.915888	ko00982	Metabolism	Xenobiotics biodegradation and metabolism	FMO4;MGST2	K00485+K00799
Huntington's disease	7	544	260	18435	0.6472	0.917722	0.912366	ko05016	Human Diseases	Neurodegenerative diseases	DNAH17;DNAH7;DNAH12;DNAH1;PPARGC1A;GPX2;GPX3	K10408+K07202+K00432
Antigen processing and presentation	5	544	187	18435	0.6476	0.917722	0.906093	ko04612	Organismal Systems	Immune system	EPHX3;CD74;BOLA-DRB2;BOLA-DMA;BOLA-DRB3	K08059+K06505+K06752
Long-term depression	2	544	75	18435	0.652	0.918244	0.903676	ko04730	Organismal Systems	Nervous system	IGF1R;IGF1	K05087+K05459
Regulation of lipolysis in adipocytes	2	544	76	18435	0.6589	0.918244	0.891786	ko04923	Organismal Systems	Endocrine system	PIK3CD;PLIN1	K00922+K08768
Citrate cycle (TCA cycle)	1	544	37	18435	0.6692	0.918244	0.915888	ko00020	Metabolism	Carbohydrate metabolism	ACO2	K01681
Amphetamine addiction	3	544	119	18435	0.6835	0.918244	0.854316	ko05031	Human Diseases	Substance dependence	GRIN2A;LOC536445;MSS51	K05209+K04348
Dopaminergic synapse	5	544	196	18435	0.6868	0.918244	0.864486	ko04728	Organismal Systems	Nervous system	GRIN2A;LOC536445;ARRB1;MSS51;MAPK10	K05209+K04439+K04348+K04440
Allograft rejection	3	544	121	18435	0.6941	0.918244	0.840195	ko05330	Human Diseases	Immune diseases	BOLA-DRB2;BOLA-DMA;BOLA-DRB3	K06752
Pentose and glucuronate interconversions	1	544	40	18435	0.6969	0.918244	0.847197	ko00040	Metabolism	Carbohydrate metabolism	AKR1A1	K00002
RNA polymerase	1	544	40	18435	0.6969	0.918244	0.847197	ko03020	Genetic Information Processing	Transcription	POLR3H	K03022
Aldosterone synthesis and secretion	3	544	123	18435	0.7044	0.918244	0.826533	ko04925	Organismal Systems	Endocrine system	CACNA1G;HSD3B1;VLDLR	K04854+K00070+K12473
Circadian rhythm	1	544	41	18435	0.7056	0.918244	0.826533	ko04710	Organismal Systems	Environmental adaptation	PER3	K02633
Mucin type O-Glycan biosynthesis	1	544	41	18435	0.7056	0.918244	0.826533	ko00512	Metabolism	Glycan biosynthesis and metabolism	B3GNT6	K00739
Alanine, aspartate and glutamate metabolism	1	544	41	18435	0.7056	0.918244	0.826533	ko00250	Metabolism	Amino acid metabolism	ADSSL1	K01939
GABAergic synapse	3	544	124	18435	0.7094	0.918244	0.819868	ko04727	Organismal Systems	Nervous system	SLC32A1;GABRP;GABRE	K15015+K05189+K05185
Jak-STAT signaling pathway	6	544	240	18435	0.7112	0.918244	0.847197	ko04630	Environmental Information Processing	Signal transduction	PIK3CD;CTF1;IL2RB;LOC100336476;LOC100336606;PTPN6	K00922+K05422+K05069+K05066+K05697
Sphingolipid signaling pathway	4	544	164	18435	0.7133	0.918244	0.826533	ko04071	Environmental Information Processing	Signal transduction	PIK3CD;LOC101902808;ACER1;MAPK10	K00922+K04514+K01441+K04440
Alzheimer's disease	6	544	241	18435	0.7148	0.918244	0.843681	ko05010	Human Diseases	Neurodegenerative diseases	GRIN2A;LOC536445;ATP2A1;ATP2A3;MSS51;BACE1	K05209+K05853+K04348+K04521
VEGF signaling pathway	2	544	85	18435	0.7166	0.918244	0.797362	ko04370	Environmental Information Processing	Signal transduction	PIK3CD;MSS51	K00922+K04348
TNF signaling pathway	4	544	165	18435	0.7176	0.918244	0.821524	ko04668	Environmental Information Processing	Signal transduction	MAP2K6;PIK3CD;ISOC2;MAPK10	K04433+K00922+K04432+K04440
Fructose and mannose metabolism	1	544	43	18435	0.7223	0.918244	0.78809	ko00051	Metabolism	Carbohydrate metabolism	MPI	K01809
Thyroid cancer	1	544	43	18435	0.7223	0.918244	0.78809	ko05216	Human Diseases	Cancers: Specific types	LOC101904481	K09290
Non-alcoholic fatty liver disease (NAFLD)	5	544	205	18435	0.7229	0.918244	0.826533	ko04932	Human Diseases	Endocrine and metabolic diseases	PIK3CD;IL1A;PAQR6;COL8A2;MAPK10	K00922+K04383+K07297+K07296+K04440
Pyrimidine metabolism	3	544	127	18435	0.7242	0.918244	0.800501	ko00240	Metabolism	Nucleotide metabolism	DPYD;UPP2;POLR3H	K00207+K00757+K03022
SNARE interactions in vesicular transport	1	544	44	18435	0.7302	0.918267	0.770179	ko04130	Genetic Information Processing	Folding, sorting and degradation	STX17	K08491
Non-small cell lung cancer	2	544	88	18435	0.7339	0.918267	0.770179	ko05223	Human Diseases	Cancers: Specific types	PIK3CD;CDKN2A	K00922+K06621
ErbB signaling pathway	3	544	130	18435	0.7383	0.918267	0.782028	ko04012	Environmental Information Processing	Signal transduction	PIK3CD;BTC;MAPK10	K00922+K09783+K04440
Colorectal cancer	2	544	90	18435	0.7449	0.918267	0.753064	ko05210	Human Diseases	Cancers: Specific types	PIK3CD;MAPK10	K00922+K04440
Primary bile acid biosynthesis	1	544	46	18435	0.7455	0.918267	0.736693	ko00120	Metabolism	Lipid metabolism	HSD3B7	K12408
Inositol phosphate metabolism	2	544	91	18435	0.7503	0.918267	0.744788	ko00562	Metabolism	Carbohydrate metabolism	PIK3CD;ITPKB	K00922+K00911
Retinol metabolism	2	544	91	18435	0.7503	0.918267	0.744788	ko00830	Metabolism	Metabolism of cofactors and vitamins	DHRS3;HSD17B11	K11146+K15734
Ubiquitin mediated proteolysis	5	544	215	18435	0.7594	0.918267	0.78809	ko04120	Genetic Information Processing	Folding, sorting and degradation	HERC3;UBE2D4;EEPD1;TPGS1;STOM	K10614+K06689+K10260+K02207+K03364
Regulation of autophagy	1	544	48	18435	0.7599	0.918267	0.705997	ko04140	Cellular Processes	Transport and catabolism	ATG4A	K08342
Peroxisome	3	544	136	18435	0.7649	0.918267	0.747526	ko04146	Cellular Processes	Transport and catabolism	MLYCD;CROT;ECI2	K01578+K05940+K13239
PPAR signaling pathway	3	544	136	18435	0.7649	0.918267	0.747526	ko03320	Organismal Systems	Endocrine system	PLIN1;SLC27A1;COL8A2	K08768+K08745+K07296
Metabolism of xenobiotics by cytochrome P450	2	544	94	18435	0.7658	0.918267	0.721018	ko00980	Metabolism	Xenobiotics biodegradation and metabolism	MGST2;HSD11B1L	K00799+K15680
Tight junction	9	544	374	18435	0.7726	0.922248	0.815483	ko04530	Cellular Processes	Cellular community	CLDN8;NAV3;HCLS1;SYNE2;PPFIA4;CLDN2;JAM3;CLMN;PRKCE	K06087+K05699+K06106+K06115+K10352+K06785+K06068
Hepatitis B	5	544	223	18435	0.786	0.930339	0.759818	ko05161	Human Diseases	Infectious diseases: Viral	TLR4;PIK3CD;NFATC4;MAPK10;TLR2	K10160+K00922+K04446+K04440+K10159
Tyrosine metabolism	1	544	52	18435	0.7864	0.930339	0.65169	ko00350	Metabolism	Amino acid metabolism	FAH	K01555
Autoimmune thyroid disease	3	544	145	18435	0.8006	0.939828	0.701128	ko05320	Human Diseases	Immune diseases	BOLA-DRB2;BOLA-DMA;BOLA-DRB3	K06752
Basal transcription factors	1	544	56	18435	0.8099	0.939828	0.60514	ko03022	Genetic Information Processing	Transcription	TAF6L	K03131
Other types of O-glycan biosynthesis	1	544	56	18435	0.8099	0.939828	0.60514	ko00514	Metabolism	Glycan biosynthesis and metabolism	TMEM2	K09666
Prolactin signaling pathway	2	544	104	18435	0.8116	0.939828	0.65169	ko04917	Organismal Systems	Endocrine system	PIK3CD;MAPK10	K00922+K04440
Pyruvate metabolism	1	544	57	18435	0.8154	0.939828	0.594524	ko00620	Metabolism	Carbohydrate metabolism	PNKD	K01069
Chronic myeloid leukemia	2	544	105	18435	0.8157	0.939828	0.645483	ko05220	Human Diseases	Cancers: Specific types	PIK3CD;CDKN2A	K00922+K06621
Bladder cancer	1	544	58	18435	0.8207	0.941496	0.584274	ko05219	Human Diseases	Cancers: Specific types	CDKN2A	K06621
Vibrio cholerae infection	2	544	110	18435	0.8351	0.944768	0.616143	ko05110	Human Diseases	Infectious diseases: Bacterial	TBC1D24;ATP6V1B1	K02155+K02147
Chemical carcinogenesis	2	544	111	18435	0.8388	0.944768	0.610592	ko05204	Human Diseases	Cancers: Overview	MGST2;HSD11B1L	K00799+K15680
TGF-beta signaling pathway	2	544	111	18435	0.8388	0.944768	0.610592	ko04350	Environmental Information Processing	Signal transduction	LOC101902808;SMAD9	K04514+K04676
Glycine, serine and threonine metabolism	1	544	62	18435	0.8404	0.944768	0.546579	ko00260	Metabolism	Amino acid metabolism	AMT	K00605
Glucagon signaling pathway	3	544	161	18435	0.8529	0.944768	0.631451	ko04922	Organismal Systems	Endocrine system	NINL;PPARGC1A;MSS51	K00688+K07202+K04348
Hippo signaling pathway	4	544	205	18435	0.8533	0.944768	0.661227	ko04390	Environmental Information Processing	Signal transduction	WNT2B;DFNB31;SMAD9;ITGB2	K00182+K12076+K04676+K06464
Nucleotide excision repair	1	544	65	18435	0.8538	0.944768	0.521352	ko03420	Genetic Information Processing	Replication and repair	ERCC5	K10846
Vasopressin-regulated water reabsorption	1	544	65	18435	0.8538	0.944768	0.521352	ko04962	Organismal Systems	Excretory system	NYNRIN	K04228
Cell cycle	4	544	208	18435	0.8608	0.944768	0.65169	ko04110	Cellular Processes	Cell growth and death	RAD21L1;CDKN2C;CDKN2A;STOM	K06670+K06622+K06621+K03364
Endometrial cancer	1	544	67	18435	0.8621	0.944768	0.505789	ko05213	Human Diseases	Cancers: Specific types	PIK3CD	K00922
Wnt signaling pathway	4	544	210	18435	0.8656	0.944768	0.645483	ko04310	Environmental Information Processing	Signal transduction	WNT2B;NFATC4;MSS51;MAPK10	K00182+K04446+K04348+K04440
Measles	5	544	255	18435	0.8699	0.944768	0.664468	ko05162	Human Diseases	Infectious diseases: Viral	TLR4;PIK3CD;IL1A;IL2RB;TLR2	K10160+K00922+K04383+K05069+K10159
Valine, leucine and isoleucine degradation	1	544	69	18435	0.8699	0.944768	0.491129	ko00280	Metabolism	Amino acid metabolism	ECHDC3	K07511
RIG-I-like receptor signaling pathway	2	544	122	18435	0.8743	0.945671	0.555539	ko04622	Organismal Systems	Immune system	NLRX1;MAPK10	K12653+K04440
Oocyte meiosis	3	544	175	18435	0.8884	0.957016	0.580935	ko04114	Cellular Processes	Cell growth and death	IGF1R;MSS51;IGF1	K05087+K04348+K05459
Viral carcinogenesis	7	544	356	18435	0.899	0.959088	0.666334	ko05203	Human Diseases	Cancers: Overview	PIK3CD;NAV3;C3;DFNB31;GRB7;CDKN2A;LOC614376	K00922+K05699+K03990+K12076+K05855+K06621+K11252
Glycolysis / Gluconeogenesis	1	544	78	18435	0.9	0.959088	0.43446	ko00010	Metabolism	Carbohydrate metabolism	AKR1A1	K00002
Small cell lung cancer	2	544	133	18435	0.9025	0.959088	0.509592	ko05222	Human Diseases	Cancers: Specific types	PIK3CD;LAMA1	K00922+K05637
Melanogenesis	2	544	134	18435	0.9048	0.959088	0.505789	ko04916	Organismal Systems	Endocrine system	WNT2B;MC1R	K00182+K04199
Cholinergic synapse	2	544	139	18435	0.9153	0.962065	0.487595	ko04725	Organismal Systems	Nervous system	CHRM3;PIK3CD	K04131+K00922
Cytosolic DNA-sensing pathway	1	544	85	18435	0.9185	0.962065	0.398681	ko04623	Organismal Systems	Immune system	POLR3H	K03022
Acute myeloid leukemia	1	544	85	18435	0.9185	0.962065	0.398681	ko05221	Human Diseases	Cancers: Specific types	PIK3CD	K00922
Oxidative phosphorylation	2	544	146	18435	0.9282	0.968398	0.464217	ko00190	Metabolism	Energy metabolism	TBC1D24;ATP6V1B1	K02155+K02147
Biosynthesis of amino acids	1	544	96	18435	0.9409	0.973105	0.352999	ko01230	Metabolism	Global and overview maps	ACO2	K01681
mRNA surveillance pathway	2	544	157	18435	0.9448	0.973105	0.431693	ko03015	Genetic Information Processing	Translation	PAPOLG;ZC3H6	K14376+K14404
Estrogen signaling pathway	2	544	159	18435	0.9474	0.973105	0.426262	ko04915	Organismal Systems	Endocrine system	PIK3CD;PRKCE	K00922+K06068
Renin secretion	1	544	100	18435	0.9474	0.973105	0.338879	ko04924	Organismal Systems	Endocrine system	MSS51	K04348
Protein processing in endoplasmic reticulum	3	544	226	18435	0.9617	0.981112	0.449839	ko04141	Genetic Information Processing	Folding, sorting and degradation	UBE2D4;UBXN11;MAPK10	K06689+K14012+K04440
Neurotrophin signaling pathway	3	544	227	18435	0.9626	0.981112	0.447857	ko04722	Organismal Systems	Nervous system	PIK3CD;MAPK10;PRKCE	K00922+K04440+K06068
Gap junction	1	544	121	18435	0.9715	0.986389	0.280065	ko04540	Cellular Processes	Cellular community	TUBA1D	K07374
Alcoholism	4	544	306	18435	0.9791	0.990311	0.442979	ko05034	Human Diseases	Substance dependence	GRIN2A;LOC536445;PKIA;LOC614376	K05209+K15985+K11252
Ribosome	1	544	167	18435	0.9926	1	0.202921	ko03010	Genetic Information Processing	Translation	LOC101903478	K02978
Spliceosome	1	544	222	18435	0.9985	1	0.152648	ko03040	Genetic Information Processing	Transcription	SSBP4	K12831
Olfactory transduction	6	544	1499	18435	1	1	0.135642	ko04740	Organismal Systems	Sensory system	GUCY2D;LOC104975936;ARRB1;OR52W1;OR12D2;OR2W1	K12321+K04257+K04439

## Sheet: C2-vs-S2_Up
Pathway	DEGs annotation in term	DEGs with KEGG annotation	Genes annotation in term	All genes with KEGG annotation	Pvalue	FDR	Enrichment factor	Pathway ID	Level 1	Level 2	Genes	KOs
Transcriptional misregulation in cancer	11	80	415	18435	2.116e-06	0.000220064	6.10798	ko05202	Human Diseases	Cancers: Overview	ETV5;DUSP1;DUSP6;PLAU;CSF2;DUSP8;ZEB1;DUSP5;ZNF280B;ETV4;MYC	K15593+K04459+K01348+K05427+K09299+K10500+K15592+K04377
Jak-STAT signaling pathway	8	80	240	18435	1.168e-05	0.00060736	7.68125	ko04630	Environmental Information Processing	Signal transduction	CCND1;IL6;CSF2;PIM1;LIF;IL6R;IL11;MYC	K04503+K05415+K05427+K04702+K05419+K05055+K05417+K04377
MAPK signaling pathway	9	80	365	18435	3.332e-05	0.00115509	5.68202	ko04010	Environmental Information Processing	Signal transduction	FLNC;JUN;DUSP1;DUSP6;DUSP8;DUSP5;FOS;HSPA6;MYC	K04437+K04448+K04459+K04379+K03283+K04377
HTLV-I infection	9	80	427	18435	0.0001084	0.0028184	4.857	ko05166	Human Diseases	Infectious diseases: Viral	EGR1;JUN;CCND1;CSF2;ETS1;FOS;FOSL1;ZFP36;MYC	K09203+K04448+K04503+K05427+K02678+K04379+K04502+K15308+K04377
Bladder cancer	4	80	58	18435	0.000149	0.0030992	15.8922	ko05219	Human Diseases	Cancers: Specific types	CCND1;RASSF1;HBEGF;MYC	K04503+K09850+K08523+K04377
Colorectal cancer	4	80	90	18435	0.0007337	0.0126093	10.2417	ko05210	Human Diseases	Cancers: Specific types	JUN;CCND1;FOS;MYC	K04448+K04503+K04379+K04377
TNF signaling pathway	5	80	165	18435	0.0008487	0.0126093	6.98295	ko04668	Environmental Information Processing	Signal transduction	TNFAIP3;JUN;CSF2;FOS;LIF	K11859+K04448+K05427+K04379+K05419
MicroRNAs in cancer	6	80	261	18435	0.001047	0.013611	5.29741	ko05206	Human Diseases	Cancers: Overview	CCND1;PLAU;ZEB1;PIM1;RASSF1;MYC	K04503+K01348+K09299+K04702+K09850+K04377
Hippo signaling pathway	5	80	205	18435	0.00216	0.02496	5.62043	ko04390	Environmental Information Processing	Signal transduction	CCND1;PARD6B;SERPINE1;RASSF1;MYC	K04503+K06093+K03982+K09850+K04377
ErbB signaling pathway	4	80	130	18435	0.002712	0.0282048	7.09038	ko04012	Environmental Information Processing	Signal transduction	EREG;JUN;HBEGF;MYC	K09784+K04448+K08523+K04377
Hepatitis B	5	80	223	18435	0.00308	0.02912	5.16676	ko05161	Human Diseases	Infectious diseases: Viral	JUN;CCND1;IL6;FOS;MYC	K04448+K04503+K05415+K04379+K04377
Cytokine-cytokine receptor interaction	6	80	349	18435	0.004351	0.0377087	3.96168	ko04060	Environmental Information Processing	Signaling molecules and interaction	TNFRSF21;IL6;CSF2;LIF;IL6R;IL11	K05157+K05415+K05427+K05419+K05055+K05417
Estrogen signaling pathway	4	80	159	18435	0.00545	0.0385645	5.79717	ko04915	Organismal Systems	Endocrine system	JUN;FOS;HSPA6;HBEGF	K04448+K04379+K03283+K08523
Serotonergic synapse	4	80	161	18435	0.005688	0.0385645	5.72516	ko04726	Organismal Systems	Nervous system	DUSP1;DUSP6;DUSP8;DUSP5	K04459
Mineral absorption	3	80	81	18435	0.005757	0.0385645	8.53472	ko04978	Organismal Systems	Digestive system	MT2A;SLC30A1;CLCN2	K14739+K14688+K05011
FoxO signaling pathway	4	80	163	18435	0.005933	0.0385645	5.65491	ko04068	Environmental Information Processing	Signal transduction	CCND1;PLK3;EMP1;PLK2	K04503+K08862+K08341+K08861
Acute myeloid leukemia	3	80	85	18435	0.006549	0.0400645	8.13309	ko05221	Human Diseases	Cancers: Specific types	CCND1;PIM1;MYC	K04503+K04702+K04377
Rheumatoid arthritis	4	80	173	18435	0.007264	0.0419698	5.32803	ko05323	Human Diseases	Immune diseases	JUN;CSF2;FOS;IL11	K04448+K05427+K04379+K05417
Proteoglycans in cancer	6	80	407	18435	0.008917	0.0488088	3.39711	ko05205	Human Diseases	Cancers: Overview	FLNC;CCND1;PLAUR;PLAU;HBEGF;MYC	K04437+K04503+K03985+K01348+K08523+K04377
Chagas disease (American trypanosomiasis)	4	80	192	18435	0.01031	0.051059	4.80078	ko05142	Human Diseases	Infectious diseases: Parasitic	JUN;IL6;FOS;SERPINE1	K04448+K05415+K04379+K03982
Complement and coagulation cascades	4	80	192	18435	0.01031	0.051059	4.80078	ko04610	Organismal Systems	Immune system	F3;PLAUR;PLAU;SERPINE1	K03901+K03985+K01348+K03982
Cell cycle	4	80	208	18435	0.01343	0.0626713	4.43149	ko04110	Cellular Processes	Cell growth and death	CCND1;ZNF280B;WEE1;MYC	K04503+K10500+K06632+K04377
Wnt signaling pathway	4	80	210	18435	0.01386	0.0626713	4.38929	ko04310	Environmental Information Processing	Signal transduction	JUN;CCND1;FOSL1;MYC	K04448+K04503+K04502+K04377
Osteoclast differentiation	4	80	216	18435	0.01519	0.0658233	4.26736	ko04380	Organismal Systems	Development	JUN;IL6;FOS;FOSL1	K04448+K05415+K04379+K04502
Thyroid cancer	2	80	43	18435	0.01619	0.0673504	10.718	ko05216	Human Diseases	Cancers: Specific types	CCND1;MYC	K04503+K04377
Salmonella infection	4	80	254	18435	0.02554	0.0996089	3.62894	ko05132	Human Diseases	Infectious diseases: Bacterial	FLNC;JUN;CSF2;FOS	K04437+K04448+K05427+K04379
Measles	4	80	255	18435	0.02586	0.0996089	3.61471	ko05162	Human Diseases	Infectious diseases: Viral	TNFAIP3;CCND1;IL6;HSPA6	K11859+K04503+K05415+K03283
Toll-like receptor signaling pathway	3	80	148	18435	0.02768	0.102811	4.67103	ko04620	Organismal Systems	Immune system	JUN;IL6;FOS	K04448+K05415+K04379
Hematopoietic cell lineage	3	80	161	18435	0.03414	0.122433	4.29387	ko04640	Organismal Systems	Immune system	CSF2;IL6R;IL11	K05427+K05055+K05417
Endometrial cancer	2	80	67	18435	0.03589	0.124419	6.87873	ko05213	Human Diseases	Cancers: Specific types	CCND1;MYC	K04503+K04377
Epstein-Barr virus infection	4	80	310	18435	0.04708	0.157946	2.97339	ko05169	Human Diseases	Infectious diseases: Viral	TNFAIP3;JUN;HSPA6;MYC	K11859+K04448+K03283+K04377
Pathways in cancer	6	80	611	18435	0.05057	0.164353	2.26289	ko05200	Human Diseases	Cancers: Overview	JUN;CCND1;ETS1;FOS;RASSF1;MYC	K04448+K04503+K02678+K04379+K09850+K04377
Central carbon metabolism in cancer	2	80	85	18435	0.05448	0.171436	5.42206	ko05230	Human Diseases	Cancers: Overview	SLC7A5;MYC	K13780+K04377
Renal cell carcinoma	2	80	87	18435	0.05672	0.171436	5.29741	ko05211	Human Diseases	Cancers: Specific types	JUN;ETS1	K04448+K02678
Non-small cell lung cancer	2	80	88	18435	0.05785	0.171436	5.23722	ko05223	Human Diseases	Cancers: Specific types	CCND1;RASSF1	K04503+K09850
Prion diseases	2	80	90	18435	0.06013	0.171436	5.12083	ko05020	Human Diseases	Neurodegenerative diseases	EGR1;HSPA6	K09203+K03283
Epithelial cell signaling in Helicobacter pylori infection	2	80	92	18435	0.06245	0.171436	5.00951	ko05120	Human Diseases	Infectious diseases: Bacterial	JUN;HBEGF	K04448+K08523
T cell receptor signaling pathway	3	80	207	18435	0.06264	0.171436	3.33967	ko04660	Organismal Systems	Immune system	JUN;CSF2;FOS	K04448+K05427+K04379
Hippo signaling pathway - fly	2	80	103	18435	0.0757	0.193638	4.47451	ko04391	Environmental Information Processing	Signal transduction	PARD6B;MYC	K06093+K04377
Protein processing in endoplasmic reticulum	3	80	226	18435	0.07682	0.193638	3.0589	ko04141	Genetic Information Processing	Folding, sorting and degradation	YOD1;HSPA6;PPP1R15A	K13719+K03283+K14019
Prolactin signaling pathway	2	80	104	18435	0.07695	0.193638	4.43149	ko04917	Organismal Systems	Endocrine system	CCND1;FOS	K04503+K04379
Chronic myeloid leukemia	2	80	105	18435	0.0782	0.193638	4.38929	ko05220	Human Diseases	Cancers: Specific types	CCND1;MYC	K04503+K04377
TGF-beta signaling pathway	2	80	111	18435	0.08585	0.205991	4.15203	ko04350	Environmental Information Processing	Signal transduction	FST;MYC	K04661+K04377
Leishmaniasis	2	80	112	18435	0.08715	0.205991	4.11496	ko05140	Human Diseases	Infectious diseases: Parasitic	JUN;FOS	K04448+K04379
PI3K-Akt signaling pathway	5	80	556	18435	0.09535	0.217925	2.07228	ko04151	Environmental Information Processing	Signal transduction	EPHA2;CCND1;IL6;IL6R;MYC	K05103+K04503+K05415+K05055+K04377
Amphetamine addiction	2	80	119	18435	0.09639	0.217925	3.8729	ko05031	Human Diseases	Substance dependence	JUN;FOS	K04448+K04379
Oxytocin signaling pathway	3	80	254	18435	0.1	0.221277	2.7217	ko04921	Organismal Systems	Endocrine system	JUN;CCND1;FOS	K04448+K04503+K04379
Natural killer cell mediated cytotoxicity	3	80	263	18435	0.108	0.233469	2.62856	ko04650	Organismal Systems	Immune system	IL6;CSF2;ULBP21	K05415+K05427+K07986
Pertussis	2	80	129	18435	0.11	0.233469	3.57267	ko05133	Human Diseases	Infectious diseases: Bacterial	JUN;FOS	K04448+K04379
Small cell lung cancer	2	80	133	18435	0.1156	0.237	3.46523	ko05222	Human Diseases	Cancers: Specific types	CCND1;MYC	K04503+K04377
GnRH signaling pathway	2	80	134	18435	0.117	0.237	3.43937	ko04912	Organismal Systems	Endocrine system	JUN;HBEGF	K04448+K08523
p53 signaling pathway	2	80	135	18435	0.1185	0.237	3.41389	ko04115	Cellular Processes	Cell growth and death	CCND1;SERPINE1	K04503+K03982
MAPK signaling pathway - fly	1	80	31	18435	0.1295	0.254113	7.43347	ko04013	Environmental Information Processing	Signal transduction	ETS1	K02678
Choline metabolism in cancer	2	80	152	18435	0.1431	0.270589	3.03207	ko05231	Human Diseases	Cancers: Overview	JUN;FOS	K04448+K04379
B cell receptor signaling pathway	2	80	152	18435	0.1431	0.270589	3.03207	ko04662	Organismal Systems	Immune system	JUN;FOS	K04448+K04379
HIF-1 signaling pathway	2	80	161	18435	0.1566	0.290829	2.86258	ko04066	Environmental Information Processing	Signal transduction	SERPINE1;IL6R	K03982+K05055
Influenza A	3	80	322	18435	0.1659	0.298075	2.14693	ko05164	Human Diseases	Infectious diseases: Viral	JUN;IL6;HSPA6	K04448+K05415+K03283
Mucin type O-Glycan biosynthesis	1	80	41	18435	0.1665	0.298075	5.62043	ko00512	Metabolism	Glycan biosynthesis and metabolism	GALNT16	K00710
Herpes simplex infection	3	80	325	18435	0.1691	0.298075	2.12712	ko05168	Human Diseases	Infectious diseases: Viral	JUN;IL6;FOS	K04448+K05415+K04379
Thyroid hormone signaling pathway	2	80	176	18435	0.1796	0.311307	2.61861	ko04919	Organismal Systems	Endocrine system	CCND1;MYC	K04503+K04377
Regulation of autophagy	1	80	48	18435	0.1914	0.326321	4.80078	ko04140	Cellular Processes	Transport and catabolism	EMP1	K08341
Signaling pathways regulating pluripotency of stem cells	2	80	187	18435	0.1967	0.329948	2.46457	ko04550	Cellular Processes	Cellular community	LIF;MYC	K05419+K04377
Non-alcoholic fatty liver disease (NAFLD)	2	80	205	18435	0.2252	0.366925	2.24817	ko04932	Human Diseases	Endocrine and metabolic diseases	JUN;IL6R	K04448+K05055
Dorso-ventral axis formation	1	80	58	18435	0.2258	0.366925	3.97306	ko04320	Organismal Systems	Development	ETS1	K02678
NF-kappa B signaling pathway	2	80	211	18435	0.2347	0.371091	2.18424	ko04064	Environmental Information Processing	Signal transduction	TNFAIP3;PLAU	K11859+K01348
Ras signaling pathway	3	80	385	18435	0.2355	0.371091	1.79562	ko04014	Environmental Information Processing	Signal transduction	EPHA2;ETS1;RASSF1	K05103+K02678+K09850
Nucleotide excision repair	1	80	65	18435	0.249	0.386507	3.54519	ko03420	Genetic Information Processing	Replication and repair	LOC101904203	K10847
Focal adhesion	3	80	428	18435	0.2856	0.43273	1.61522	ko04510	Cellular Processes	Cellular community	FLNC;JUN;CCND1	K04437+K04448+K04503
Cocaine addiction	1	80	77	18435	0.2871	0.43273	2.99269	ko05030	Human Diseases	Substance dependence	JUN	K04448
Cytosolic DNA-sensing pathway	1	80	85	18435	0.3115	0.460676	2.71103	ko04623	Organismal Systems	Immune system	IL6	K05415
Melanoma	1	80	86	18435	0.3145	0.460676	2.67951	ko05218	Human Diseases	Cancers: Specific types	CCND1	K04503
Axon guidance	2	80	270	18435	0.329	0.46914	1.70694	ko04360	Organismal Systems	Development	EPHA2;SEMA7A	K05103+K06529
Inositol phosphate metabolism	1	80	91	18435	0.3293	0.46914	2.53228	ko00562	Metabolism	Carbohydrate metabolism	ITPKC	K00911
Legionellosis	1	80	98	18435	0.3494	0.491049	2.3514	ko05134	Human Diseases	Infectious diseases: Bacterial	HSPA6	K03283
Glioma	1	80	103	18435	0.3634	0.503915	2.23726	ko05214	Human Diseases	Cancers: Specific types	CCND1	K04503
Fc epsilon RI signaling pathway	1	80	105	18435	0.3689	0.504811	2.19464	ko04664	Organismal Systems	Immune system	CSF2	K05427
Pancreatic cancer	1	80	110	18435	0.3825	0.516623	2.09489	ko05212	Human Diseases	Cancers: Specific types	CCND1	K04503
RNA degradation	1	80	115	18435	0.3958	0.527733	2.0038	ko03018	Genetic Information Processing	Folding, sorting and degradation	BTG2	K14443
NOD-like receptor signaling pathway	1	80	120	18435	0.4088	0.538104	1.92031	ko04621	Organismal Systems	Immune system	TNFAIP3	K11859
RIG-I-like receptor signaling pathway	1	80	122	18435	0.414	0.538104	1.88883	ko04622	Organismal Systems	Immune system	IL6	K05415
GABAergic synapse	1	80	124	18435	0.4191	0.538104	1.85837	ko04727	Organismal Systems	Nervous system	EMP1	K08341
Prostate cancer	1	80	129	18435	0.4316	0.547395	1.78634	ko05215	Human Diseases	Cancers: Specific types	CCND1	K04503
Circadian entrainment	1	80	138	18435	0.4535	0.556158	1.66984	ko04713	Organismal Systems	Environmental adaptation	FOS	K04379
Cholinergic synapse	1	80	139	18435	0.4558	0.556158	1.65782	ko04725	Organismal Systems	Nervous system	FOS	K04379
Tuberculosis	2	80	355	18435	0.4584	0.556158	1.29824	ko05152	Human Diseases	Infectious diseases: Bacterial	IL6;PLK3	K05415+K08862
Viral carcinogenesis	2	80	356	18435	0.4599	0.556158	1.29459	ko05203	Human Diseases	Cancers: Overview	JUN;CCND1	K04448+K04503
Inflammatory bowel disease (IBD)	1	80	143	18435	0.4653	0.556221	1.61145	ko05321	Human Diseases	Immune diseases	JUN	K04448
cAMP signaling pathway	2	80	365	18435	0.4728	0.558764	1.26267	ko04024	Environmental Information Processing	Signal transduction	JUN;FOS	K04448+K04379
Phosphatidylinositol signaling system	1	80	152	18435	0.4859	0.567793	1.51604	ko04070	Environmental Information Processing	Signal transduction	ITPKC	K00911
Endocytosis	2	80	383	18435	0.498	0.575467	1.20333	ko04144	Cellular Processes	Transport and catabolism	PARD6B;HSPA6	K06093+K03283
Rap1 signaling pathway	2	80	392	18435	0.5103	0.5832	1.1757	ko04015	Environmental Information Processing	Signal transduction	EPHA2;PARD6B	K05103+K06093
Toxoplasmosis	1	80	172	18435	0.5289	0.597887	1.33975	ko05145	Human Diseases	Infectious diseases: Parasitic	HSPA6	K03283
Hepatitis C	1	80	185	18435	0.5549	0.611739	1.24561	ko05160	Human Diseases	Infectious diseases: Viral	IL6	K05415
Viral myocarditis	1	80	185	18435	0.5549	0.611739	1.24561	ko05416	Human Diseases	Cardiovascular diseases	CCND1	K04503
Antigen processing and presentation	1	80	187	18435	0.5588	0.611739	1.23229	ko04612	Organismal Systems	Immune system	HSPA6	K03283
Dopaminergic synapse	1	80	196	18435	0.5758	0.623783	1.1757	ko04728	Organismal Systems	Nervous system	FOS	K04379
AMPK signaling pathway	1	80	202	18435	0.5868	0.629146	1.14078	ko04152	Environmental Information Processing	Signal transduction	CCND1	K04503
Spliceosome	1	80	222	18435	0.6215	0.659551	1.03801	ko03040	Genetic Information Processing	Transcription	HSPA6	K03283
Neurotrophin signaling pathway	1	80	227	18435	0.6297	0.661503	1.01514	ko04722	Organismal Systems	Nervous system	JUN	K04448
Amoebiasis	1	80	263	18435	0.6838	0.711152	0.876188	ko05146	Human Diseases	Infectious diseases: Parasitic	CSF2	K05427
Calcium signaling pathway	1	80	323	18435	0.7572	0.779691	0.713429	ko04020	Environmental Information Processing	Signal transduction	ITPKC	K00911
Neuroactive ligand-receptor interaction	1	80	365	18435	0.7982	0.813851	0.631336	ko04080	Environmental Information Processing	Signaling molecules and interaction	NMUR2	K05053
Tight junction	1	80	374	18435	0.8061	0.813926	0.616143	ko04530	Cellular Processes	Cellular community	PARD6B	K06093
Metabolic pathways	2	80	1691	18435	0.9958	0.9958	0.272546	ko01100	Metabolism	Global and overview maps	ITPKC;GALNT16	K00911+K00710
